# Supplementary material for: Bismuth–ferrocene carboxylates: synthesis and structure
Source: Royal Society of Chemistry journal article supplement (doi:10.1039/c2dt31153d), 2012-01-01
Supplement: c2dt31153d.pdf [file c2dt31153d.pdf]

## Supporting Information

# Bismuth-Ferrocene Carboxylates: Synthesis and Structure

Vadapalli Chandrasekhar,\* and Ramesh K. Metre

Department of Chemistry, Indian Institute of Technology Kanpur, Kanpur – 208016, India.

[\*] Prof. V. Chandrasekhar  
Department of Chemistry  
Indian Institute of Technology, Kanpur  
Kanpur – 208016, India  
Fax: (+91)-512-2597436  
E-mail: vc@iitk.ac.in

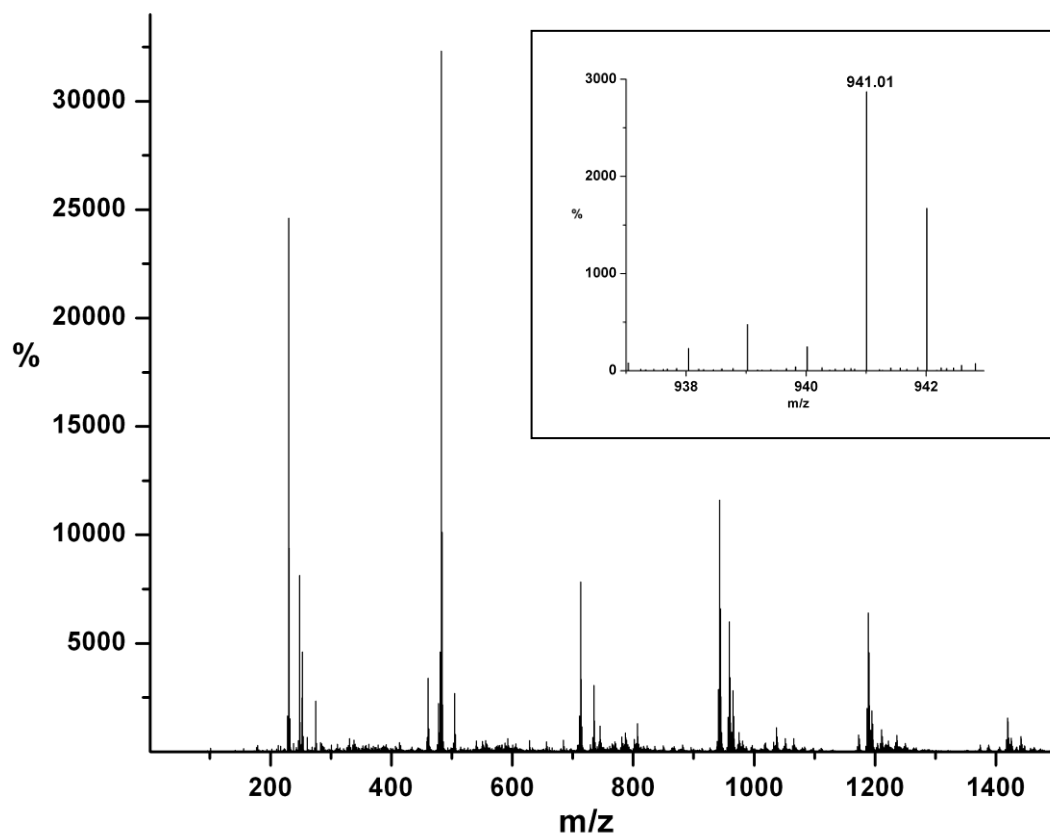

**Figure S1** ESI-MS of **2**

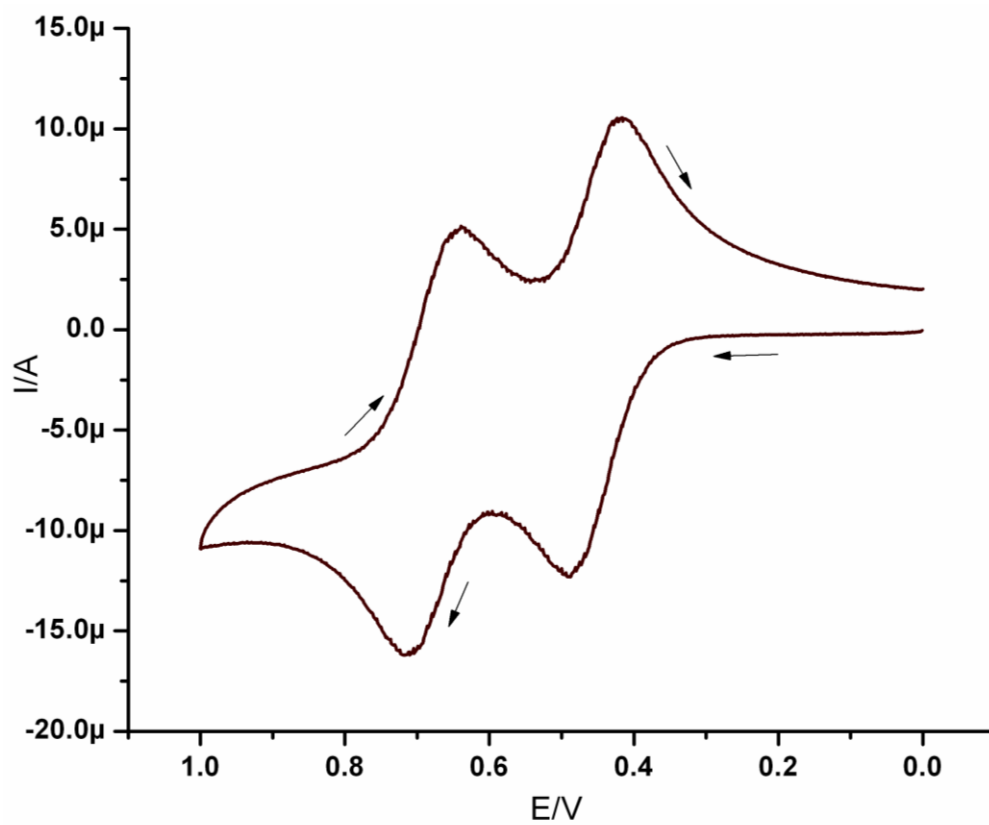

**Figure S2.** cyclic voltammogram of **2** ( $3.33 \times 10^{-4}$  M) in presence of ferrocene ( $10^{-3}$  M) [vs Ag/AgCl; scan rate: 250 (mV/s)]

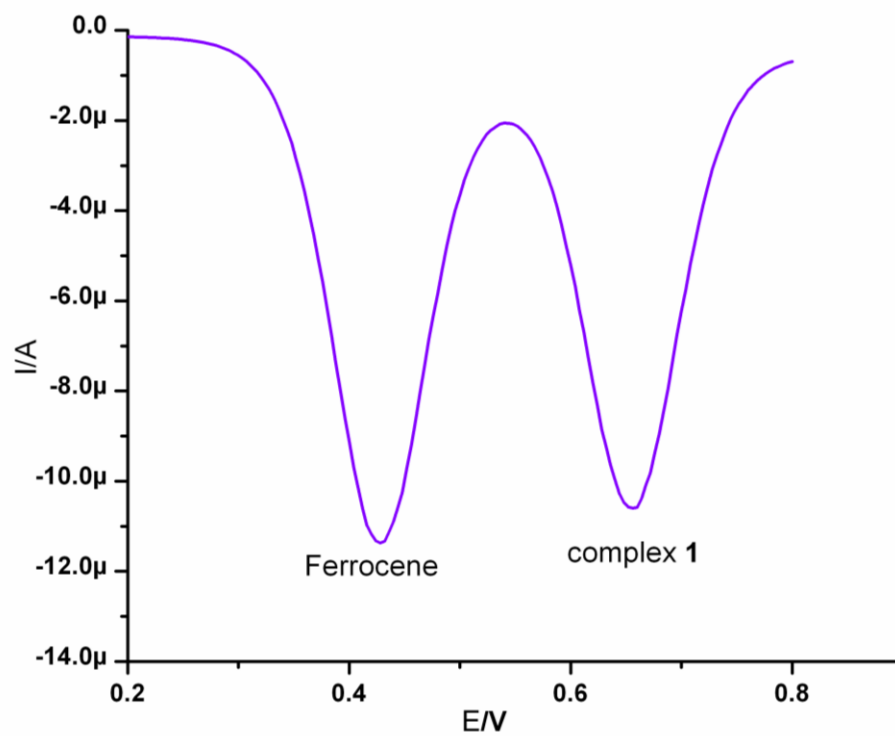

**Figure S3.** Differential pulse voltammogram of **2** ( $I_p = 1.13 \times 10^{-5}$  A) and ferrocene ( $I_p = 1.06 \times 10^{-5}$  A).

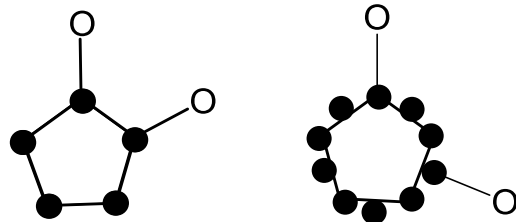

Synclinal (eclipsed)

Anticlinal (staggered)

**Chart 2. Conformations of the ferrocenedicarboxylate ligand in 1<sup>a</sup>**

<sup>a</sup> Synclinal (eclipsed) conformation corresponds to the situation where the two cyclopentadienyl groups are perfectly eclipsed while the 1,1' substituents on these rings are not. In anticlinal (staggered) conformation the two cyclopentadienyl rings as well as two substituents on the 1,1' positions are staggered.

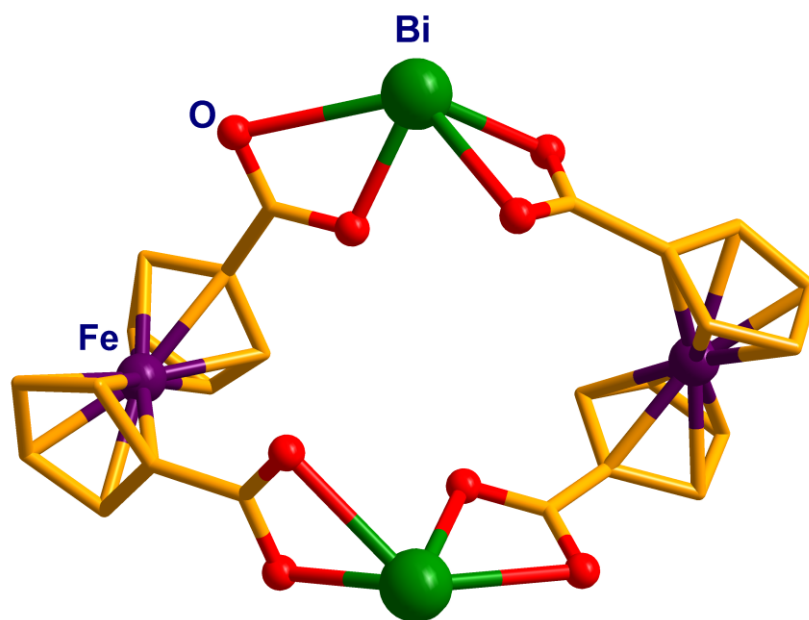

**Figure S4** Heterobimetallic tetranuclear (Bi<sub>2</sub>Fe<sub>2</sub>) 16 membered macrocycle **1**

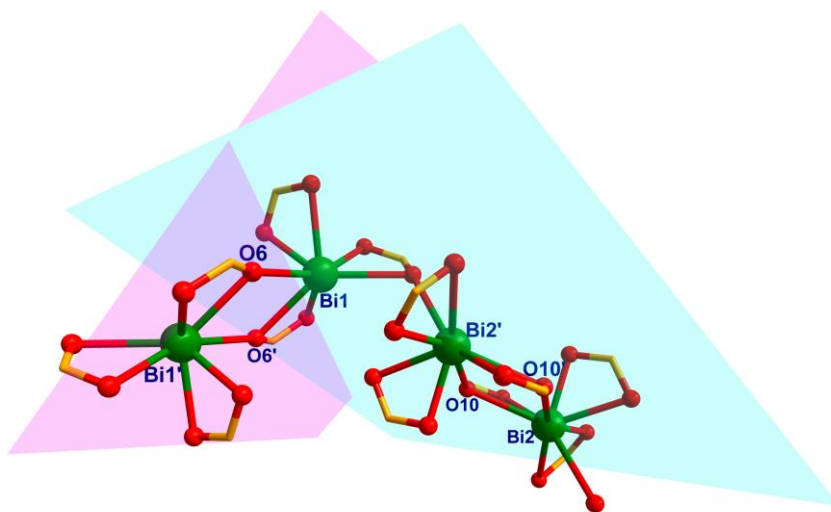

**Figure S5.** Figure showing planes passing through motif **A** and motif **B** in **1** with dihedral angle of  $63.85(3)^\circ$ . (ferrocenedicarboxylate units and hydrogen atoms have been omitted for the sake of clarity)

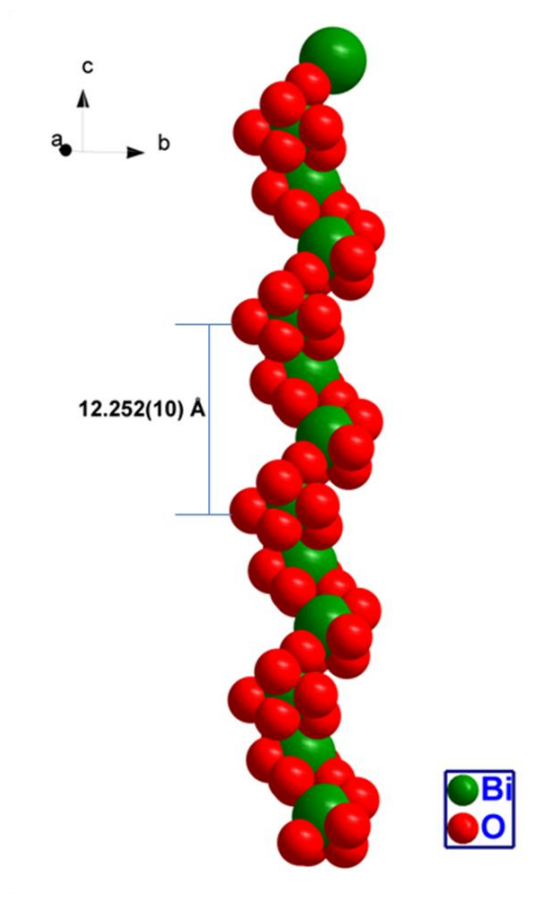

**Figure S6 .** 1D helical chain of **2**. Only Bi and O atoms are shown while other atoms have been omitted for sake of clarity.



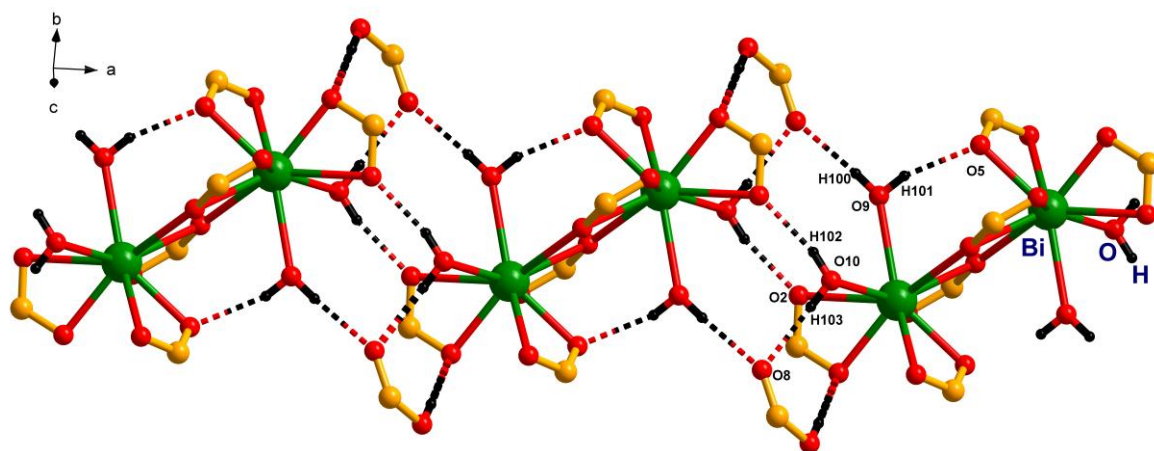

**Figure S7.** View showing intermolecular  $\text{O-H}_{(\text{water})}\cdots\text{O}_{(\text{ferrocene})}$  and  $\text{O-H}_{(\text{ferrocene})}\cdots\text{O}_{(\text{ferrocene})}$  interactions of compound **3**. Ferrocene units of all ferrocene carboxylate ligands have been omitted for the sake clarity. The metric parameters involved are:  $\text{O9-H101}$ , 0.816 (4),  $\text{H101-O5}$ , 2.054 (3) Å and  $\text{O10-H103-O8}$ , 164.54 (38)°.  $\text{O9-H100}$ , 0.813 (4),  $\text{H100-O8}$ , 2.069 (4) Å and  $\text{O9-H100-O8}$ , 174.13 (41)°.  $\text{O10-H102}$ , 0.826 (4),  $\text{H102-O2}$ , 1.962 (4) Å and  $\text{O10-H102-O2}$ , 167.56 (43)°.  $\text{O7-H7}$ , 0.839 (1),  $\text{H7-O1}$ , 1.869 (3) Å and  $\text{O7-H7-O1}$ , 174.43 (41)°



**Table 1.** Selected bond distance (Å) and bond angle (°) data for **1** and **2**

| Compound 1        |           |                       |          | Compound 2        |          |                   |            |
|-------------------|-----------|-----------------------|----------|-------------------|----------|-------------------|------------|
| Bond distances(Å) |           | Bond angles(°)        |          | Bond distances(Å) |          | Bond angles(°)    |            |
| Bi(1)-O(2)        | 2.212(12) | O(11)-Bi(1)-O(6)      | 129.2(4) | Bi(1)-O(6)        | 2.192(6) | O(2)-Bi(1)-O(4)   | 78.1(2)    |
| Bi(1)-O(5)        | 2.556(11) | O(6)-Bi(1)-O(11)#1    | 75.4(4)  | Bi(1)-O(2)        | 2.236(6) | O(6)-Bi(1)-O(1)   | 77.2(2)    |
| Bi(1)-O(11)       | 2.287(9)  | O(6)-Bi(1)-O(1)       | 127.9(4) | Bi(1)-O(4)        | 2.271(6) | O(4)-Bi(1)-O(1)   | 131.9(2)   |
| Bi(1)-O(1)        | 2.493(13) | O(11)#1-Bi(1)-O(5)    | 129.3(4) | Bi(1)-O(1)        | 2.449(6) | O(2)-Bi(1)-O(5)   | 127.5(2)   |
| Bi(1)-O(6)        | 2.271(10) | O(1)-Bi(1)-O(5)       | 129.0(4) | Bi(1)-O(5)        | 2.597(7) | O(1)-Bi(1)-O(5)   | 124.2(2)   |
| Bi(1)-O(12)       | 2.607(11) | O(2)-Bi(1)-O(12)#1    | 134.9(3) | Bi(1)-O(3)        | 2.674(6) | O(6)-Bi(1)-O(3)   | 132.2(2)   |
| Bi(2)-O(7)        | 2.190(11) | O(11)#1-Bi(1)-O(12)#1 | 52.1(3)  | Bi(1)-O(3) #1     | 2.702(6) | O(2)-Bi(1)-O(3)   | 72.3(2)    |
| Bi(2)-O(4)        | 2.503(11) | O(7)-Bi(2)-O(3)       | 87.3(4)  |                   |          | O(1)-Bi(1)-O(3)   | 114.1(2)   |
| Bi(2)-O(9)        | 2.258(11) | O(7)-Bi(2)-O(9)       | 79.3(4)  |                   |          | O(5)-Bi(1)-O(3)   | 118.5(2)   |
| Bi(2)-O(3)        | 2.207(11) | O(4)-Bi(2)-O(10)      | 130.9(4) |                   |          | O(6)-Bi(1)-O(3)#1 | 78.1(2)    |
| Bi(2)-O(10)       | 2.628(11) | O(7)-Bi(2)-O(12)#3    | 88.0(4)  |                   |          | O(2)-Bi(1)-O(3)#1 | 121.0(2)   |
| Bi(2)-O(12) #3    | 2.658(10) | O(9)-Bi(2)-O(12)#3    | 147.4(4) |                   |          | O(4)-Bi(1)-O(3)#1 | 150.8(2)   |
|                   |           |                       |          |                   |          | O(1)-Bi(1)-O(3)#1 | 66.78(19)  |
|                   |           |                       |          |                   |          | O(5)-Bi(1)-O(3)#1 | 76.91(19)  |
|                   |           |                       |          |                   |          | O(3)-Bi(1)-O(3)#1 | 149.73(19) |

For compound 1: Symmetry transformations used to generate equivalent atoms: #1  $x+1,y,z+1$   
 #3  $-x,-y+1,-z+1$

For compound 2: Symmetry transformations used to generate equivalent atoms: #1  $-x+2,-y+1,-z+1$

**Table 2.** Important bond distance (Å) and bond angle (°) data for **3**

| Compound <b>3</b> |          |                    |            |
|-------------------|----------|--------------------|------------|
| Bond distances(Å) |          | Bond angles(°)     |            |
| Bi(1)-O(3)        | 2.306(3) | O(4)-Bi(1)-O(4)#1  | 69.26(11)  |
| Bi(1)-O(5)        | 2.324(3) | O(9)-Bi(1)-O(4)#1  | 74.63(10)  |
| Bi(1)-O(1)        | 2.335(3) | O(10)-Bi(1)-O(4)#1 | 84.53(11)  |
| Bi(1)-O(6)        | 2.574(3) | O(3)-Bi(1)-O(5)    | 77.95(11)  |
| Bi(1)-O(2)        | 2.592(3) | O(3)-Bi(1)-O(6)    | 123.67(11) |
| Bi(1)-O(4)        | 2.637(3) | O(5)-Bi(1)-O(2)    | 134.22(11) |
| Bi(1)-O(9)        | 2.657(4) | O(6)-Bi(1)-O(2)    | 116.02(10) |
| Bi(1)-O(10)       | 2.659(4) | O(1)-Bi(1)-O(4)    | 128.51(10) |
| Bi(1)-O(4)#1      | 2.665(3) | O(6)-Bi(1)-O(4)    | 120.32(10) |
|                   |          | O(2)-Bi(1)-O(4)    | 118.37(10) |
|                   |          | O(5)-Bi(1)-O(9)    | 141.33(11) |
|                   |          | O(1)-Bi(1)-O(9)    | 127.49(11) |
|                   |          | O(6)-Bi(1)-O(9)    | 147.44(11) |
|                   |          | O(3)-Bi(1)-O(10)   | 148.33(11) |
|                   |          | O(5)-Bi(1)-O(10)   | 126.73(11) |
|                   |          | O(4)-Bi(1)-O(10)   | 146.46(10) |
|                   |          | O(3)-Bi(1)-O(4)#1  | 121.72(10) |
|                   |          | O(5)-Bi(1)-O(4)#1  | 82.40(11)  |
|                   |          | O(1)-Bi(1)-O(4)#1  | 152.95(10) |
|                   |          | O(6)-Bi(1)-O(4)#1  | 81.64(10)  |
|                   |          | O(2)-Bi(1)-O(4)#1  | 143.32(10) |

Symmetry transformations used to generate equivalent atoms: #1 -x+1,-y+1,-z+1
